# 1 Heterogeneous genomic architecture of skeletal armour traits in sticklebacks

2

## 3 Abstract

4 Whether populations adapt to similar selection pressures using the same underlying genetic variants  
5 depends on population history and the distribution of standing genetic variation at the  
6 metapopulation level. Studies of sticklebacks provide a case in point: when colonising and adapting  
7 to freshwater habitats, three-spined sticklebacks (*Gasterosteus aculeatus*; TSSs) with high gene  
8 flow tend to fix the same adaptive alleles in the same major loci, whereas nine-spined sticklebacks  
9 (*Pungitius pungitius*; NPSs) with limited gene flow tend to utilize a more heterogeneous set of loci.  
10 In accordance with this, we report results of quantitative trait locus (QTL) analyses using a F<sub>2</sub> back-  
11 cross design showing that lateral plate number variation in the western European lineage of NPSs  
12 mapped to three moderate-effect QTL, contrary to one major QTL in TSSs and these QTL were  
13 different from the four previously identified QTL in the eastern European lineage of NPSs.  
14 Furthermore, several QTL were identified associated with variation in lateral plate size, and three  
15 moderate-effect QTL with body size. Together, these findings indicate that genetic underpinnings of  
16 skeletal armour variation in *Pungitius* sticklebacks are more polygenic and heterogeneous than those  
17 in three-spined sticklebacks, indicating limited genetic parallelism underlying armour trait evolution  
18 in the family Gasterostidae.

19 **Key words:** body size, lateral plate, parallel evolution, *Pungitius pungitius*, QTL

20

## 21 Introduction

22 Why and when evolution can be repeatable and predictable remains a longstanding question in  
23 biology. Parallel evolution has been the prevailing hypothesis explaining repeatable phenotypic  
24 evolution (Martin and Orgogozo, 2013) by a set of identical-by-descent genetic variants controlling

25 the same adaptive traits in multiple independent evolutionary lineages (Schluter et al. 2004). The  
26 probability of parallel evolution depends on many factors (MacPherson and Nuismer 2017; Bolnick  
27 et al. 2018), including how standing genetic variation is distributed at the metapopulation level  
28 (Fang. et al. 2020; Fang et al. 2021; Kempainen et al. 2021; Schlötterer 2023). When populations  
29 are well connected, adaptive alleles are easily transported from one population to another and  
30 thereby available to be picked by selection in multiple populations subject to similar environmental  
31 pressures (Ralph and Coop 2015; Bailey et al. 2017; Lee and Coop 2017; Roberts-Kingman et al.  
32 2021). However, once gene flow is sufficiently restricted, the potentially adaptive alleles may not  
33 reach all populations, forcing selection to work with alternative alleles in different loci (Merilä  
34 2014; Kempainen et al. 2021). The likelihood of parallel evolution is also influenced by  
35 demographic history of populations (MacPherson and Nuismer 2017; Thompson et al. 2019):  
36 parallel evolution is less likely in small populations where bottlenecks and strong genetic drift result  
37 in the stochastic loss of adaptive alleles (Leinonen et al. 2012; Fang et al. 2020; Dahms et al. 2022).  
38 Accordingly, smaller and less connected populations tend to have more heterogeneous genetic  
39 architectures underlying the same morphological transitions even if driven by similar ecological  
40 pressures, resulting in non-parallel evolutionary responses to selection. Understanding the relative  
41 contributions of parallel and non-parallel genetic changes to repeated phenotypic evolution in the  
42 wild can improve theoretical understanding of the role of natural selection in shaping genetic  
43 variation (Johannesson 2001) and inform predictions on the evolutionary potential of species and  
44 populations to cope with ongoing environmental changes (Bay et al. 2017).

45 While early research found ample evidence of genetic parallelism at both species and population  
46 levels (Colosimo et al. 2005; Stewart and Thompson 2009; Bernatchez et al. 2010; Elmer et al.  
47 2010), it is now becoming increasingly clear that parallelism is perhaps not as common as  
48 previously thought (e.g., Bolnick et al. 2018; Fang et al. 2020; Kempainen et al. 2021; Schlötterer  
49 2023). The prevailing hypothesis of parallel evolution could thus stem from an ascertainment bias  
50 driven by the novelty value of discovering evidence for genetic parallelism, as well as from focus

51 on systems characterized by high genetic connectivity. On the other hand, non-parallelism is more  
52 likely to dominate in species characterized by low genetic connectivity and small effective  
53 population sizes. The stickleback fishes have been popular model systems to study the repeatability  
54 of evolution during their numerous and recurrent colonisations from marine to freshwater habitats  
55 throughout past glacial cycles (e.g., Colosimo et al. 2005; Coyle et al. 2007; Marchinko and  
56 Schluter, 2007; Chan et al. 2010; DeFaveri et al. 2011, 2013; Jones et al. 2012; Merilä 2013; Fang  
57 et al. 2021; Kemppainen et al. 2021; Reid et al. 2021; Roberts-Kingman et al., 2021). What has  
58 transpired from these studies is that in the case of the three-spined stickleback (*Gasterosteus*  
59 *aculeatus*), adaptation to the freshwater environment is typically achieved by parallel genetic  
60 changes in major-effect loci (Colosimo et al. 2005; Chan et al. 2010; Peichel and Marques, 2017;  
61 Reid et al. 2021; but see: DeFaveri et al. 2011; Leinonen et al. 2012; Erickson et al. 2016; Fang et  
62 al. 2021). However, in the case of the nine-spined stickleback (*Pungitius pungitius*), there is much  
63 less genetic parallelism over similar geographic distances in response to adaptation to freshwater  
64 environments (Shikano et al. 2013; Fang et al. 2021; Kemppainen et al. 2021). For example, pelvic  
65 reduction is underlied by one major-effect locus in different freshwater populations of three-spined  
66 sticklebacks (Chan et al. 2010), whereas in the case of nine-spined sticklebacks it is underlied by a  
67 range of genetic architectures from single locus to polygenic systems (Kemppainen et al. 2021).

68 Another textbook example of predictable and repeatable evolution is the lateral plate number  
69 reduction in freshwater three-spined sticklebacks after colonization from marine habitats (Colosimo  
70 et al. 2005). The majority of their freshwater populations worldwide have achieved lateral plate  
71 reduction via inheritance of the same ancestral allele associated with the Ectodysplasin-A gene  
72 (*Eda*; Colosimo et al., 2005; O'Brown et al. 2015). Quantitative trait locus (QTL) mapping studies  
73 have revealed that the QTL containing *Eda* gene explains 69% - 98% variation in lateral plate  
74 phenotypes (Colosimo et al. 2004; Liu et al. 2014; Glazer et al. 2015; Erickson et al. 2016; Schluter  
75 et al. 2021; see also: Loehr et al. 2012), suggesting large-effect single-locus basis for this  
76 ecologically important adaptive trait. However, the *Eda* gene was not associated with lateral plate

77 variation in nine-spined sticklebacks from North America (Shapiro et al. 2009) or eastern Europe  
78 (Yang et al. 2016). Instead, Yang et al. (2016) mapped the genetic architecture of lateral plate  
79 variation in the eastern European lineage (EL) of nine-spined sticklebacks to four different  
80 chromosomes (linkage groups LG8, LG12, LG20, LG21), none of which included the *Eda* gene.  
81 These studies thus suggest major interspecific differences in genetic architectures of lateral plate  
82 variation within the stickleback family Gasterosteidae, as well as a more polygenic and  
83 heterogeneous genetic architecture for this trait in the genus *Pungitius*.

84 The main aim of this study was to address the repeatable phenotypic evolution hypothesis (Martin  
85 and Orgogozo, 2013) in the context of genetic architectures of lateral plate phenotypes in *Pungitius*  
86 sticklebacks. To test the hypothesis of parallel evolution, we mapped QTL associated with variation  
87 in lateral plate numbers utilizing a F<sub>2</sub>-generation backcross family between two closely related  
88 *Pungitius* species: the fully plated *P. sinensis* and the partially plated *P. pungitius* from the western  
89 European lineage (WL). The WL *P. pungitius* has a distinct evolutionary history from the eastern  
90 European lineage (EL; Teacher et al. 2011; Guo et al. 2019; Feng et al. 2022) and has not yet been  
91 studied regarding their armour plate genetic architecture. The repeatable evolution hypothesis  
92 predicts that lateral plate number variation in the WL should be controlled by allelic variation either  
93 in the same genetic locus as that in the sister species three-spined stickleback or the previously  
94 identified QTL in the EL *P. pungitius*. The alternative hypothesis of non-parallel evolution of the  
95 same morphology underlied by different QTL is also plausible in the light of previous QTL  
96 analyses of lateral plate number variation in *Pungitius* sticklebacks (Shapiro et al. 2009; Yang et al.  
97 2016). The secondary aims of this study were to identify QTL associated with lateral plate size and  
98 body size variation in *P. pungitius*, as well as capitalize the opportunity to narrow down the location  
99 of the sex determination region in *P. sinensis* (cf. Natri et al. 2019) with the aid of a dense set of  
100 SNPs and an improved *Pungitius* reference genome (Kivikoski et al. 2021).

102 **Material and Methods**

103 *Crosses and fish rearing*

104 A fully plated female *P. sinensis* from Yoneshiro River, Odate, Japan (40°16' N, 140°29' E) was  
105 artificially crossed with a partially plated male *P. pungitius* from Brugse polders, Maldegem,  
106 Belgium (51°10' N, 03°28' E) and the resulting F<sub>1</sub> hybrids were reared in a 28-l tank at 16 °C until  
107 mature. The F<sub>1</sub> hybrid males of these crosses were found to be sterile (Natri et al. 2019), and thus a  
108 backcross was conducted by naturally mating a partially plated F<sub>1</sub> hybrid female with an outbred  
109 fully plated *P. sinensis* male (Fig. 1). This backcross mating was carried out in a 6-l tank with a  
110 zebrafish rack system (Aquaneering Inc., USA) to obtain fertilized clutches repeatedly. From three  
111 days post-hatching, larvae were fed twice daily with newly hatched brine shrimp (*Artemia sp.*)  
112 nauplii. Approximately eight weeks post-hatching, frozen bloodworms (Chironomidae larvae) were  
113 added to their diet. The 24-h photoperiod was maintained during the rearing. Wild fish were  
114 obtained in accordance with national and institutional ethical regulations with permission from the  
115 Finnish Food Safety Authority (#1181/0527/2011 and #3701/0460/2011). All fish rearing was  
116 conducted under the license from the Finnish National Animal Experiment Board (#STH379A and  
117 #PH1236A).

118

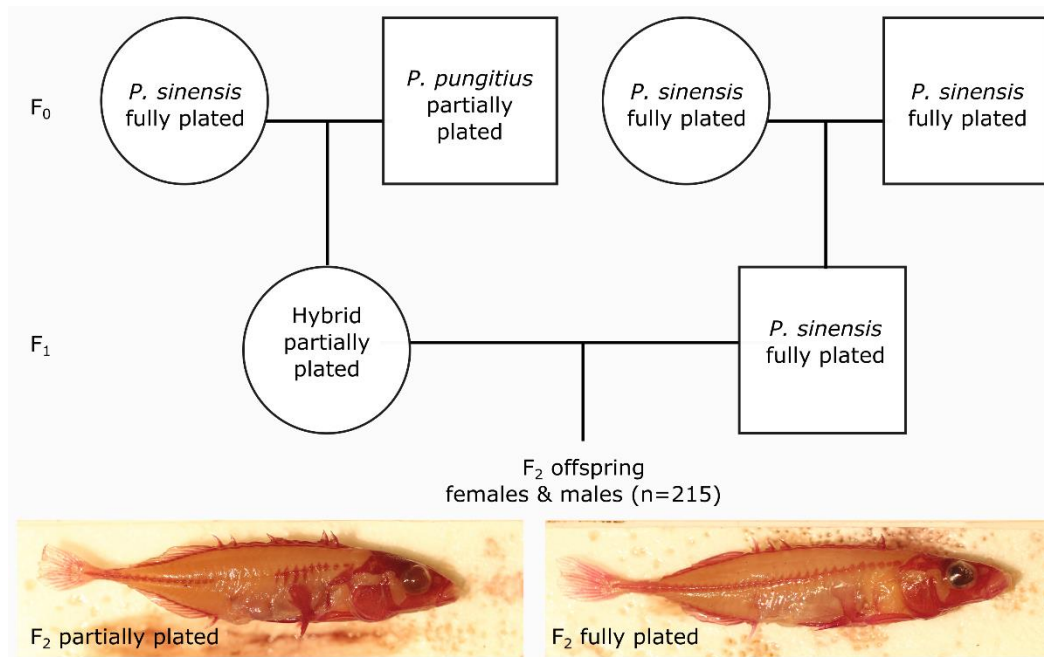

119

120 **Figure 1. The backcross experiment between fully plated *Pungitius sinensis* from Japan and**  
121 **partially plated *P. pungitius* from Belgium.** Circles represent females and squares represent  
122 males. The two photos show fully plated and partially plated phenotypes of the F<sub>2</sub> progeny stained  
123 with alizarin red.

124

125 The F<sub>2</sub> progeny were reared in 28-l tanks (20–30 fish per tank) at 16°C for 40 weeks after hatching.  
126 At the end of the experiments, the wild-caught grandparents (F<sub>0</sub>), F<sub>1</sub> parents, and F<sub>2</sub> offspring were  
127 euthanized with MS-222 (Tricaine methanesulfonate) and stored in ethanol. A fin clip was taken  
128 from all individuals and preserved at -18°C for DNA extractions. In total, 215 F<sub>2</sub> offspring from six  
129 clutches were available for the analyses (Table S1). Phenotypic measurements (see below) were  
130 taken from these F<sub>2</sub> offspring and their sex was recorded based on gonadal inspection after  
131 dissection.

132 *Phenotypic measurements*

133 Firstly, the ethanol-stored carcasses of F<sub>2</sub> offspring were fixed in 4% formalin and stained with  
134 alizarin red following the standard procedure (e.g., Trokovic et al. 2011) to visualize bony

135 structures. Subsequently, phenotypes were quantified by ImageJ  
136 (<https://imagej.nih.gov/ij/index.html>) from photographs (Fig. 1; Fig. S1) of the stained fish.  
137 Standard length and maximum body height of each specimen was measured to nearest 0.01mm  
138 from the photographs.

139 Plate and myomere numbers were counted on both sides of the body under a dissecting microscope.  
140 The proportion of plated myomeres on each side was calculated to represent the level of platedness.  
141 The height, width and surface area of the largest lateral plates were measured on both sides of the  
142 body. Most of the largest plates were found on myomere seven counted from the anterior part of the  
143 body towards the tail (Fig. S1). If the fish had no plate in these positions, the largest plate located  
144 within the first 15 anterior myomeres were measured instead with their myomere position recorded.  
145 We did not measure plates on the myomere positions > 15 because plates in the posterior region  
146 have distinct shapes and sizes compared to those in more anterior positions. Measurements of the  
147 same phenotype on the left and right sides of the body were highly correlated ( $r > 0.86$ ,  $p < 1e-10$ ;  
148 Fig. S2). Therefore, in the following analyses we used average values of each measurement of the  
149 two sides.

150 The distribution of phenotypic measurements was visualized in R (R core team 2022). Traits fitting  
151 the normal distribution (namely standard length, body height, plate area, plate height, and plate  
152 width; Fig. S3) were analysed using raw values. Distributions of the plate number and the  
153 proportion of plated myomeres were left-skewed and bimodal because of the presence of only fully-  
154 and partially-plated individuals (Fig. S3). This pattern is related to our experimental design (Fig. 1)  
155 where offspring genotypes can only be *P. sinensis* homozygotes (SS, likely fully-plated) or *P.*  
156 *sinensis*-*P. pungitius* heterozygotes (SP, likely partially-plated). Therefore, the missing *P.*  
157 *pungitius* homozygous genotypes likely account for the lack of low-plated individuals (WL *P.*  
158 *pungitius* have on average 5.4 lateral plates; Banarescu and Paepke 2001) and the left skew of plate  
159 number distribution. We first conducted QTL analyses on the mean number of plates  
160 (plateN\_mean) as a numeric trait. To account for the lack of normality in the distribution of raw

161 data, we also conducted QTL analyses on two transformed binary traits. First, the plate number was  
162 transformed into a binary trait, plateN\_binary, where individuals were labeled as partially-plated if  
163 having the mean number of plates  $\leq 25$  (around the peak of the first phenotype cluster, Fig. S3) and  
164 the rest of the individuals were fully-plated. Second, the proportion of plated myomeres was  
165 transformed into the binary trait, plateness, where individuals having 100% plated myomeres on  
166 both sides were considered fully-plated while the rest were partially-plated.

### 167 *Sequencing and genotyping*

168 DNA was extracted from the preserved fin-clips of wild-caught grandparents, F<sub>1</sub> hybrid parents, and  
169 F<sub>2</sub> offspring using the modified salting out method of Sunnucks and Hales (1996). Libraries for the  
170 restriction-site associated DNA sequencing (RADseq) were prepared using the *Pst*I restriction  
171 enzyme (Miller et al. 2007). The prepared libraries were sequenced on an Illumina HiSeq<sup>TM</sup> 2000  
172 (BGI Hong Kong). Demultiplexed raw sequencing data were obtained from BGI with adapter and  
173 low-quality reads removed. These reads were around 43bp in length and they were mapped to the  
174 reference genome of *Pungitius pungitius* (version 7, Kivikoski et al. 2021) using the BWA v0.7.17  
175 backtrack algorithm (bwa aln and bwa samse; Li and Durbin 2009). The mapped reads were  
176 reformatted, sorted, and indexed using SAMtools version 1.16.1 (Danecek et al. 2021). Genotyping  
177 was conducted according to the sequencing data processing pipeline of Lep-MAP3 (Rastas 2017).  
178 Briefly, SAMtools mpileup (Li 2011) was run on the mapped data by linkage group. The version 7  
179 reference genome has 21 linkage groups (LGs) and 1645 unassembled contigs (including a  
180 mitochondrial genome). Very few data were mapped to the unassembled contigs whose physical  
181 positions were unclear. Therefore, we only used the data mapped to the 21 linkage groups as the  
182 input of the Lep-MAP3 module Pileup2Likelihoods to estimate genotypes.

### 183 *Linkage map construction*

184 Linkage maps were constructed following the Lep-MAP3 default pipeline (Rastas 2017). Briefly,  
185 the module ParentCall2 was run on all genotyped individuals (offspring, parents, grandparents) with



186 the noninformative sites removed (removeNonInformative=1). The retained genotypes were  
187 processed by the module Filtering2 with the parameter dataTolerance=0.001 (i.e., segregation  
188 distortion limit 1:1000). Then the module SeparateChromosomes2 was run to assign markers to  
189 linkage groups (ordered by size) using the parameter lodLimit=50. The first (i.e., largest) 21 linkage  
190 groups were retained, corresponding to the number of chromosomes in the reference genome (Fig.  
191 S4). The linkage map was modified by collapsing all the other linkage groups with unassigned  
192 singletons. Next, the module JoinSingletons2All was run using the modified linkage map and the non-  
193 filtered genotyping data (the output from ParentCall2) to map as many singletons to the 21 linkage  
194 groups as possible, using the parameters lodLimit=40, lodDifference=2, lod3, Mode=3, iterate=1,  
195 and distortionLod=1. Finally, the module OrderMarkers2 was used to order markers in the mapped  
196 21 linkage groups and generate phased maternal maps using commands outputPhasedData=1 and  
197 informativeMask=2.

198 To get optimal results, OrderMarkers2 was run five times independently for each linkage group and  
199 the runs having the highest likelihoods were used as the optimal parent-phased maps. These optimal  
200 maps were then evaluated in OrderMarkers2 (command evaluateOrder) with additional parameters  
201 improveOrder=0 and grandparentPhase=1 to convert them into grandparental phases. The optimal  
202 parental phases and corresponding grandparental phases were matched using the phasematch.awk  
203 script of Lep-MAP3. The matched maps were converted back to genomic coordinates using the awk  
204 script in Lep-MAP3, and the maps were re-named by chromosomes based on the physical positions  
205 of their markers. In each map, the few markers that were located in different physical chromosomes  
206 were removed. Then the converted linkage maps were visualized by plotting the genetic position  
207 (centiMorgan, cM) against the physical position (bp), and the maps were further cleaned by  
208 manually removing the outlier markers and markers that generated gaps at the start or end of each  
209 linkage map. Finally, the map2genotypes.awk script of Lep-MAP3 was used to convert the cleaned  
210 maps into F<sub>2</sub> genotypes.

211 *QTL mapping*

212 The QTL mapping was conducted using the software R/qtl2 (Broman et al. 2019). The genotypes  
213 and linkage maps obtained from Lep-MAP3 were reformatted for R/qtl2 using custom scripts.  
214 Backcross (bc) cross type was specified in the control files. Pseudomarkers were inserted into  
215 genetic maps at the distance of 1 cM. Genotype probabilities were calculated using the error  
216 probability of 0.002. Genotype-phenotype associations were estimated by conducting genome scans  
217 (command scan1) using the default simple linear method of the Haley-Knott regression. The other  
218 R/qtl2 parameters were kept as default unless stated otherwise. Statistical significance thresholds  
219 were established using 1000 permutations (command scan1perm). The obtained significant  
220 threshold ( $p=0.05$ ) was used to identify QTL peaks and their 95% Bayes credible intervals (CI)  
221 using the command find\_peaks (peakdrop=2).

222 We first conducted QTL mapping on the binary phenotypic sex. Pearson's Chi-squared test showed  
223 that phenotypic sex was not dependent on the clutch identity ( $p = 0.798$ ) and thus we did not add  
224 any covariate in this model. The model was run on all 215 F<sub>2</sub> offspring, including 109 phenotypic  
225 females, 105 phenotypic males, and one individual of unknown phenotypic sex. Preliminary  
226 analyses indicated misidentified phenotypic sex in 11 individuals (see supplementary information)  
227 which were removed together with the sex-unknown individual from downstream analyses for  
228 clarity.

229 QTL mapping on the body size measurements (standard length and body height) was carried out  
230 with sex and clutch included as additive covariates (argument addcovar) because both phenotypes  
231 showed significant dependency on sex and clutch in tests of the Analysis of Variance (ANOVA;  
232 Table S2). For the binary traits, plateN\_binary and plateness, we tested their dependency on sex and  
233 clutch identities using the Pearson's Chi-squared test and their dependency on the standard length  
234 and body height using t-tests. None of the variables showed significant relationships ( $p > 0.05$ ) with  
235 either binary traits. Therefore, no covariate was added in the QTL mapping of plateN\_binary or  
236 plateness. For each of the other numeric traits (plate number, plate area, plate height, plate width),  
237 the dependency on sex and clutch was first tested using ANOVA. Then a generalized linear model

238 of each trait was fitted on the detected significant independent variables, and the residuals were  
239 used to further test dependency on standard length and body height (i.e., with sex and clutch  
240 controlled; Miller et al. 2014). All significant independent variables were then included as additive  
241 covariates in the QTL mapping of the corresponding trait (Table S2).

242 The genomic regions spanning the 95% CIs around significant QTL were considered as QTL  
243 regions. The percentage of phenotypic variation explained (PVE) by each significant QTL peak was  
244 calculated as  $PVE = 1 - 10^{-\frac{2}{n} * LOD}$  where  $n$  is the sample size and LOD is the logarithm of the odds  
245 of the QTL peak (Broman and Sen 2009; Smith et al. 2020). In addition, for each trait, we also used  
246 a previously described lasso regression approach to jointly incorporate all SNPs into a multilocus  
247 model to estimate the total PVE value that approximates the narrow sense heritability of a given  
248 trait (Li et al. 2017, 2018; Kempainen et al. 2021). To facilitate calculation of the lasso algorithm,  
249 the same genotype file as used for R/qtl2 analyses was re-coded by removing duplicate SNPs that  
250 had the same genotypes (2 677 SNPs retained) and merging all SNPs outside significant QTL  
251 regions into one chromosome representing the non-QTL region. For each trait (excluding sex), the  
252 total PVE was estimated using all remaining SNPs, and the PVE of each QTL was estimated using  
253 the SNPs corresponding to the given QTL region. All phenotypic analyses and QTL mapping were  
254 conducted using R version 4 (R Core Team 2022).

### 255 *QTL effects and candidate genes*

256 As we were mostly interested in traits related to lateral plate variation (i.e., plate number and plate  
257 size), we further estimated the effects of all the combinations of identified QTL peaks in these traits.  
258 QTL effects were estimated using the command `scanlcoef` and plotted using `plot_coef` in R/qtl2.  
259 The most likely genotypes of the analyzed F<sub>2</sub> offspring at each QTL peak were extracted using the  
260 command `maxmarg` in R/qtl2. Phenotypes were plotted against genotypes at each QTL peak  
261 position and by combinations of all identified QTL peaks.

262 For each QTL region, we extracted all physical markers which mapped to genetic positions within  
263 these regions and identified all genes containing these physical markers. Gene lists were made using  
264 the annotation of the version 6 reference genome (Varadharajan et al. 2019) and liftover between  
265 version 6 and version 7 reference genomes (Rastas 2020; [https://sourceforge.net/p/lep-](https://sourceforge.net/p/lep-anchor/code/ci/master/tree/liftover.awk)  
266 [anchor/code/ci/master/tree/liftover.awk](https://sourceforge.net/p/lep-anchor/code/ci/master/tree/liftover.awk)).

267

## 268 **Results**

### 269 *Genotyping and linkage maps*

270 The final dataset consisted of 221 individuals which included four F<sub>0</sub> grandparents, two F<sub>1</sub> parents,  
271 and 215 F<sub>2</sub> offspring (Fig. 1). The Lep-MAP3 Pileup2Likelihoods module identified 170 339 SNPs  
272 across the 21 linkage groups of which 84 526 informative sites were retained by ParentCall2. The  
273 largest 21 LGs identified by SeparateChromosomes2 contained 61 863 markers (Fig. S4) and the  
274 remaining 22 663 sites were designated as singletons. Finally, JoinSingles2All further added 7 485  
275 sites into the linkage groups, resulting in a total of 69 348 sites separated into 21 LGs. Preliminary  
276 results showed that fewer than 8% of markers were paternally informative (i.e., using  
277 informativeMask=13) while more than 92% of the markers were maternally informative  
278 (informativeMask=23). This observation may not be surprising given that only the F<sub>1</sub> mother was  
279 hybrid and that the males in general have fewer crossovers (Kivikoski et al. 2023). In addition, the  
280 *P. pungitius* reference genome was used which was more similar to the hybrid F<sub>1</sub> female than the F<sub>1</sub>  
281 male (*P. sinensis*). Therefore, only the maternally informative markers were utilized in the  
282 following analyses. The phased and matched maternal maps had a total of 60 089 sites, and 59 629  
283 sites were retained after the manual cleaning (Fig. S5).

### 284 *QTL mapping of sex*

285 The previous study by Natri et al. (2019) found that sex of hybrids between *P. sinensis* (ZW  
286 system) and *P. pungitius* (XY system in most lineages, unknown in WL) was controlled by the ZW  
287 system inherited from *P. sinensis* and mapped to a 19.4 cM region on LG12. In agreement with this,  
288 we found a strong association between phenotypic sex and LG12 and we narrowed down the sex  
289 determination region to two nearby QTL (in total 1 cM) with non-overlapping 95% CIs (Table 1).  
290 All F<sub>2</sub> males were homozygous and F<sub>2</sub> females heterozygous at the highest QTL peak at 11.826 cM  
291 except for 11 individuals (Fig. S6, S7) which were removed together with the individual of  
292 unknown sex (Table S1), retaining 203 individuals for the downstream analyses. The two QTL  
293 regions contained 43 SNPs located within six genes (*Usp7*, *EFS*, *DHRS4*, *Slc7a8*, *Svep1* and  
294 *TBC1D19*; Table S3).

#### 295 *QTL mapping of lateral plate phenotypes*

296 Most of the lateral plate phenotypes were significantly dependent on phenotypic sex (Table S2).  
297 Females had more ( $x = 30.1 \pm 0.45$  [S.E.]) and bigger ( $x = 2.0 \pm 0.10$  mm<sup>2</sup>) lateral plates than males  
298 (plate number  $x = 28.7 \pm 0.52$ , plate area:  $x = 1.6 \pm 0.08$  mm<sup>2</sup>). However, this sexual dimorphism is  
299 confounded by body size (females are larger, see below), as *t*-tests of plate number and plate size  
300 between sexes were not significant ( $p > 0.05$ ) after controlling for standard length. Both plate  
301 number and the percentage of plated myomeres (*viz.* plateN\_mean, plateness) were associated with  
302 a QTL at almost the same peak position in LG13 with overlapping confidence intervals (Table 1;  
303 Fig. 2A). In addition, plate number was associated with QTL on LG17 and LG4 (Fig. 2A), the latter  
304 containing the candidate gene *Eda* that controls lateral plate phenotypes in three-spined sticklebacks  
305 (Colosimo et al. 2004). Almost identical QTL regions were found when using the raw values of the  
306 plate number (plateN\_mean; Table 1) and the transformed binary trait (plateN\_binary; Table S4;  
307 Fig. S8), providing confidence of the identified regions being true QTL rather than false positives  
308 despite a skewed distribution of raw plate numbers. Both the LG4 and the LG13 QTL showed a  
309 positive effect of the *P. sinensis* - *P. pungitius* hybrid genotype (SP) whereas the LG17 QTL  
310 showed a negative effect of the SP genotype on lateral plate numbers (Fig. 3A). Consistently,

311 among the eight genotype combinations of these three QTL, the genotype having SS at both LG4  
312 and LG13 but SP at LG17 generated the lowest number of lateral plates, while the reverse (SP at  
313 LG4 and LG13 while SS at LG17) generated the highest number of lateral plates (Fig. 3B).  
314

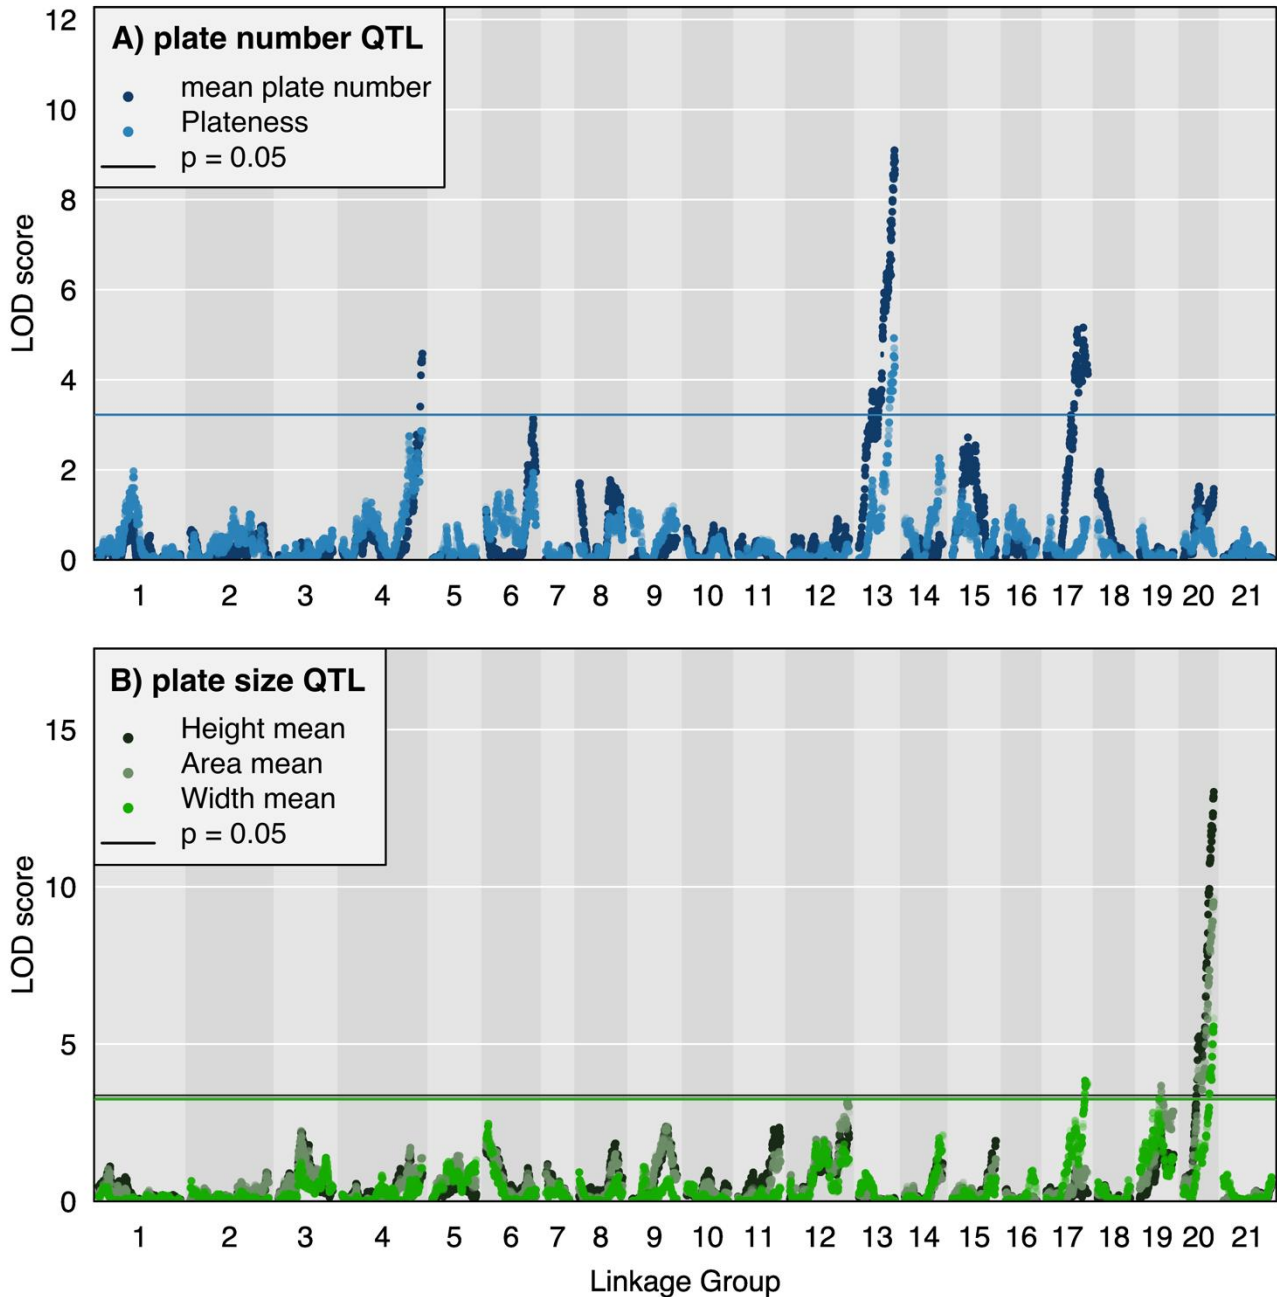

315

316 **Figure 2. The QTL for lateral plate A) number and B) size in nine-spined sticklebacks.**

317 Horizontal lines show the significance threshold ( $p = 0.05$ ) derived from 1000 permutation tests for  
318 each trait.

319

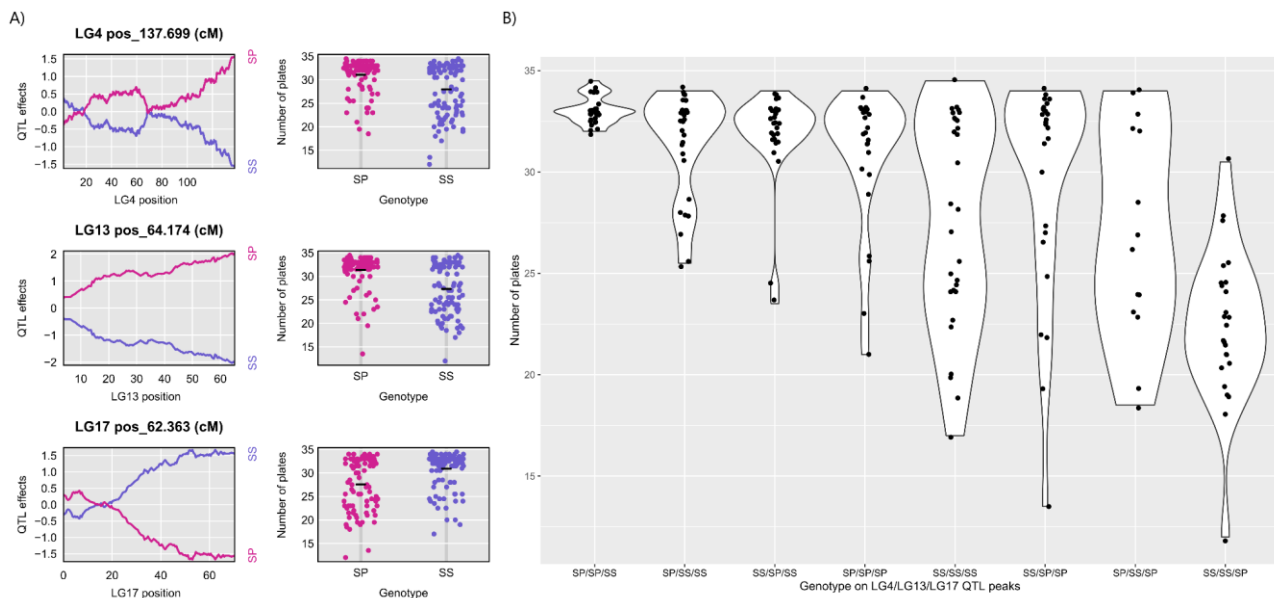

320

321

322

323

324

325

326

327

328

329

330

331

332

333

334

335

336

337

**Figure 3. Effects of the genotypes at QTL peaks on lateral plate numbers.** S represents the paternal allele from *P. sinensis* and P represents the maternal allele from *P. pungitius*. **A)** Effect size and phenotype-genotype plots of each QTL estimated by R/qt2. **B)** Distribution of individual number of plates by genotype combinations at the three QTL.

The lasso regression approach produced a genomic estimate of heritability ( $h^2$ ) at 0.486 (Table S5), a value higher than the summed PVEs of the three plate number QTL ( $\text{SumPVE} = 0.396$ ; Table 1), indicating that there might be additional QTL influencing plate number, albeit their contributions are likely to be minor.

The plate size phenotypes (*viz.* area, height, and width of the largest plate) were all associated with the same QTL peak on LG20 (Table 1; Fig. 2B). Plate area and plate width also mapped to nearby QTL peaks on LG19, but their 95% CIs were almost as wide as the entire LG including large regions of LOD scores below the significance threshold (Fig. S9). In addition, plate width also mapped to LG17, overlapping with the QTL for plate number (Table 1). All SP genotypes at these QTL peaks had positive effects except for the LG17 QTL in which SP had a negative effect on plate width (Fig. S10), similar to its negative effect on plate number (Fig. 3). Therefore, SP genotype at both LG19 and LG20 QTL peaks yielded the largest plate size and SP genotype at LG20 yielded the

338 largest plate height, whereas SP genotype at both LG19 and LG20 and SS genotype at LG17  
339 yielded the largest plate width (Fig. S11).

340 The lasso regression approach produced genomic heritabilities higher than the summed PVEs in  
341 plate area ( $h^2 = 0.495$ ;  $\text{Sum}_{\text{PVE}} = 0.276$ ), plate height ( $h^2 = 0.501$ ;  $\text{Sum}_{\text{PVE}} = 0.256$ ), and plate width  
342 ( $h^2 = 0.317$ ;  $\text{Sum}_{\text{PVE}} = 0.278$ ; Table 1, Table S5), suggesting that additional unidentified loci may  
343 influence variation in these traits.

#### 344 *QTL mapping of body size*

345 Females were significantly larger than males both in terms of standard length (SL;  $\bar{x}_{\text{females}} = 52.9 \pm$   
346  $0.57$  [S.E.] mm;  $\bar{x}_{\text{males}} = 49.0 \pm 0.44$  mm;  $t_{190.36} = 5.33$ ,  $p < 0.05$ ) and body height (BH;  $\bar{x}_{\text{females}} = 11.0$   
347  $\pm 0.15$  mm;  $\bar{x}_{\text{males}} = 10.4 \pm 0.09$  mm;  $t_{174.57} = 3.28$ ,  $p < 0.05$ ). Two moderate-effect QTL at LG12 and  
348 LG16 influenced SL and a QTL on LG6 influenced BH (Table 1; Fig. 4). The lasso method  
349 estimated genomic heritabilities of  $h^2 = 0.263$  for SL and  $h^2 = 0.206$  for BH (Table S5), and the  
350 corresponding summed PVEs across QTL were  $\text{Sum}_{\text{PVE}} = 0.265$  for SL and  $\text{Sum}_{\text{PVE}} = 0.107$  for BH  
351 (Table 1). It is noteworthy that the peak on LG6 in the analysis of SL was close to significance (Fig.  
352 4), indicating that this region might also affect standard length by affecting the body height.

353



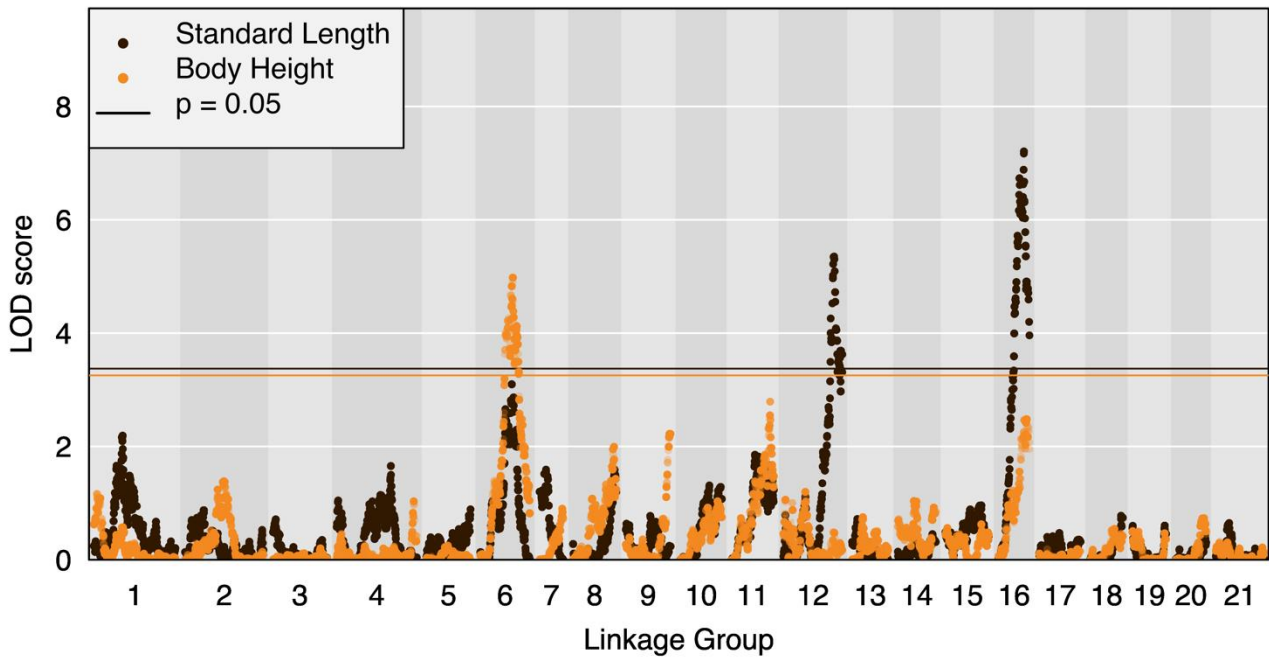

354

355 **Figure 4. The QTL regions of body size variation.** Horizontal lines show the significance  
356 threshold ( $p = 0.05$ ) derived from 1000 permutation tests for each trait.

357

#### 358 *Candidate genes*

359 All genes containing SNPs in identified QTL regions are listed in Table S3. For the plate number  
360 variation, we identified several candidate genes whose functions might be associated with  
361 stickleback skeletal development, including the *Eda* gene on LG4, the fibroblast growth factors on  
362 LG4 (*Fgf4*, *Fgf16*, *Fgf20*, Jovelin et al. 2007), the bone morphogenetic protein genes on LG17  
363 (*Bmp7*, Shawi et al. 2008; *Bmp11*, Indjeian et al. 2016), and potentially the BMP-2-inducible  
364 protein kinase on LG13 (*Bmp2k*, Li and Cao 2006; Wang et al. 2020). For the plate size variation,  
365 the *fgf23* on LG19 and the *Bmp7* and *Bmp11* on LG17 were identified as candidate genes. The BMP  
366 family in particular has been suggested to control the height and width of armor plates in  
367 sticklebacks (Indjeian et al. 2016). In addition, the paired box proteins (*Pax6* on LG19 and *Pax7* on  
368 LG17) have been found associated with the development of vertebrae in lab mice (Lang et al. 2007)  
369 and thus might also be candidate genes controlling the armor plate development in sticklebacks.  
370 The *Fgf14* on LG16 was identified as a candidate gene controlling the body size development.

371

## 372 **Discussion**

373 Our study shows that variation in lateral plate number and plate size in the western European  
374 lineage (WL) of nine-spined sticklebacks were not fully controlled either by allelic variation in the  
375 same genetic loci as in the three-spined stickleback, or by the QTL controlling these phenotypes in  
376 the eastern European lineage (EL) of nine-spined sticklebacks. These results are consistent with the  
377 observation that pelvic armor morphology in the EL nine-spined sticklebacks is both more  
378 polygenic and heterogeneous (non-parallel) compared to the three-spined stickleback (Kemppainen  
379 et al. 2021). Hence, this study comprises yet another example of similar phenotypic changes being  
380 achieved by a variety of genetic architectures ranging from monogenic to oligo- or polygenic  
381 systems in the stickleback family Gasterosteidae (Colosimo et al. 2005; Shapiro et al. 2009; Yang et  
382 al. 2016; Kemppainen et al. 2021), rather than due to genetic parallelism governed by a few large-  
383 effect loci. Our findings highlight the notion that a diversity of genetic architectures can evolve to  
384 underpin similar phenotypic transitions, and that the frequency of reuse of the same genetic  
385 variation to achieve a given phenotypic transition (i.e., parallel evolution) seems to differ markedly  
386 between three- and nine-spined sticklebacks. Therefore, although freshwater populations of nine-  
387 spined sticklebacks are characterized by both small effective population sizes and low genetic  
388 connectivity (Shikano et al. 2010; Merilä 2014; Fang et al. 2021; Kivikoski et al. 2023), our results  
389 together with recent studies (Yang et al. 2016; Kemppainen et al. 2021) highlights that these two  
390 population demographic parameters alone do not necessarily limit evolutionary potential but rather  
391 result in a higher diversity of alleles underlying adaptive evolution.

392 Our results demonstrate that the genetic basis of lateral plate number variation in the WL nine-  
393 spined sticklebacks is controlled by at least three distinct moderate-effect QTL on different linkage  
394 groups, as well as unknown small-effect loci potentially across the genome as revealed by the lasso  
395 analyses. One of the moderate-effect QTL on LG4 contained the *Eda* gene known to be the major-

396 effect locus typically explaining ~69% to 98% variation in lateral plate numbers in three-spined  
397 sticklebacks (Table 2; Colosimo et al. 2004; Liu et al. 2014; Glazer et al. 2015; Erickson et al. 2016;  
398 Schluter et al. 2021). However, this moderate-effect QTL explained only ~9.9% of variation in  
399 lateral plate numbers in WL nine-spined sticklebacks. The two other QTL associated with lateral  
400 plate number variation in our study were located on LG13 and LG17 and they accounted for 18.6%  
401 and 11.0% of variation, respectively. Hence, collectively the three QTL identified in this study  
402 accounted for up to 39.6% of variation in lateral plate numbers. Nearly similar amount of variation  
403 (33%) in this trait was explained by four QTL in the EL nine-spined sticklebacks (Table 2; Yang et  
404 al. 2016), but none of the QTL controlling lateral plate numbers are shared between EL and WL  
405 fish. Therefore, the genetic architecture of lateral plate numbers is divergent not only between the  
406 genera *Gastoreosteus* and *Pungitius* but also within the genus *Pungitius*.

407 Similar to the results regarding genetic architectures of lateral plate number variation, the three QTL  
408 controlling lateral plate size variation in WL nine-spined sticklebacks were different from those in  
409 three-spined sticklebacks (Table 2). These three QTL regions (on LG17, LG19, and LG20)  
410 accounted for up to 28% of variation in the lateral plate size. Because large effect sizes are more  
411 likely to be significant and detected as QTL regions, genetic loci of small effect sizes may not be  
412 detected due to lack of statistical power. In accordance with this, estimates from lasso regressions  
413 suggested that there are yet undetected small-effect loci (among the non-QTL SNPs) accounting for  
414 the unexplained variation (37% in plate area, 34% in plate height, and 20% in plate width, Table  
415 S5), indicating oligo- to polygenic inheritance of these traits. These results are consistent with the  
416 previous study showing that genetic architectures of pelvic reduction in nine-spined sticklebacks  
417 range from monogenic to oligogenic and polygenic inheritance (Kempainen et al. 2021).

418 Among the moderate-effect QTL (on LG6, LG12, and LG16) explaining variation in standard  
419 length and body height of the WL nine-spined sticklebacks, only the LG12 QTL is shared with the  
420 QTL affecting body size in the EL nine-spined sticklebacks (on LG8, LG12, and LG13; Laine et al.  
421 2013). Similar to the results regarding lateral plate variation, the body size variation also appears to

422 have different genetic architectures between EL and WL fishes. However, it is unclear whether the  
423 two LG12 QTL regions are actually the same or not in EL and WL, and it is hard to judge how  
424 different their genetic architectures are because our QTL analyses likely did not have power to  
425 detect loci of small effects. Nevertheless, genomic heritabilities for standard length and body depth  
426 ( $h^2 = 0.21 - 0.26$ ) were very similar to the summed PVEs of individual QTL affecting these traits  
427 ( $0.11 - 0.27$ ), suggesting an oligogenic basis of body size variation. This inference is supported by  
428 biometric estimates which have yielded very similar heritabilities within ( $h^2 = 0.13 - 0.18$ ; Shimada  
429 et al. 2011) and among ( $h^2 = 0.07 - 0.25$ ; Fraimout et al. 2022) population crosses in nine-spined  
430 sticklebacks.

431 We confirmed findings in Natri et al. (2019) that the ZW system inherited from *P. sinensis*  
432 controlled phenotypic sex of the hybrids between *P. sinensis* and *P. pungitius*. Our study also  
433 narrowed down the sex determination region of *P. sinensis* from around 19.4 cM in Natri et al.  
434 (2019) to two non-overlapping QTL regions of around total 1 cM on LG12 which explained 69% -  
435 75% of the variation in sex. Recent studies found a translocated copy of the anti-Müllerian hormone  
436 gene (*Amh*) on the Y chromosome (*Amhy*) to be the candidate sex determination gene in several  
437 stickleback lineages (Jeffries et al. 2022), including the three-spined stickleback (Peichel et al.  
438 2020), the blackspotted stickleback (*Gasterosteus wheatlandi*, Sardell et al. 2021), and the brook  
439 stickleback (*Culaea inconstans*, Jeffries et al. 2022), the latter being the sister genus of *Pungitius*  
440 (Guo et al. 2019). However, only the ancestral copy of the *Amh* gene is annotated in the nine-spined  
441 stickleback reference genome (on LG8; Varadharajan et al. 2019), indicating that it is unlikely the  
442 sex determination gene in *Pungitius* sticklebacks. In fact, so far no sex determination gene has been  
443 identified in any *Pungitius* sticklebacks despite known sex chromosomes (Jeffries et al. 2022). In  
444 this study, the SNPs mapped to sex-associated QTL regions fell into six annotated genes, among  
445 which the Ubiquitin carboxyl-terminal hydrolase 7 (*Usp7*) has been found to regulate sex  
446 chromosome development and interact with the sex determination region in mice (Luo et al. 2015;  
447 Dong et al. 2021). Therefore, *Usp7* is a candidate gene for sex determination of *P. sinensis*.

448 Among the genes that have been previously identified to have strong associations with the three-  
449 spined stickleback morphological development (summarized in Reid et al. 2021), only *Eda* on LG4  
450 was included in our candidate gene list for the lateral plate number. Furthermore, we identified  
451 *Bmp2k* on LG13 as a candidate gene that impacts plate number variation in the nine-spined  
452 stickleback, and *Bmp7* on LG17 as a gene that potentially influences both plate number and plate  
453 width (although not plate area or height). Similarly, a recent study in the three-spined stickleback  
454 also found that the BMP pathway is a strong candidate mediating the effect of *Eda* on the  
455 development of lateral plates (Rodríguez-Ramírez et al. 2023). However, as all of the QTL regions  
456 in our study included tens to hundreds of genes, little confidence can be assigned to the identified  
457 candidate genes. Further narrowing of the QTL regions would require breeding individuals beyond  
458 F<sub>2</sub> generation, or adopting genome-wide association approaches with larger sample sizes than what  
459 was available for this study.

460 The strong isolation by distance in the sea and severe bottlenecks associated with freshwater  
461 colonisations have led to the prediction that nine-spined sticklebacks are more limited in reaching  
462 their phenotypic optima when colonising freshwater habitats compared to three spined sticklebacks  
463 (Fang et al. 2021). This prediction was supported by the observation that in three freshwater (pond)  
464 populations of EL nine-spined sticklebacks, pelvic reduction was only complete in one population  
465 where it was controlled by a single large-effect locus (*pitx1*), whereas the other two populations  
466 only showed some level of pelvic reduction possibly controlled by alternative medium- or small-  
467 effect alleles at other QTL regions (Kemppainen et al. 2021). Similarly, here we showed that the  
468 reduction of lateral plate numbers in freshwater WL nine-spined sticklebacks is controlled by  
469 multiple medium- to small-effect loci that are different from those in EL nine-spined sticklebacks  
470 and the large-effect *Eda* gene in three-spined sticklebacks. Accordingly, empirical evidence rejected  
471 the hypothesis of parallel evolution in the repeatable phenotypic changes of freshwater *Pungitius*  
472 sticklebacks, but indicated non-parallel and possibly redundant genetic architectures leading to  
473 similar phenotypic changes. Such redundancy is likely crucial for the evolutionary potential of

474 species and populations facing rapid environmental changes, especially in fragmented habitats  
475 causing increased genetic differentiation and bottlenecks. For the species with fragmented small  
476 populations, redundant genetic architectures increase the likelihood that at least some populations  
477 can adapt to some novel environmental pressures, but it is difficult to achieve adaptation in all traits  
478 within one population, and the long term species survival probability will still depend on the spread  
479 of adaptive alleles across populations via gene flow.

480

## 481 **Conclusions and outlook**

482 In conclusion, our results add to the growing evidence (Shapiro et al. 2009; Shikano et al. 2013;  
483 Yang et al. 2016; Fang et al. 2020; Kemppainen et al. 2021) that the repeatability of evolutionary  
484 transitions in response to similar selection pressures in *Pungitius* sticklebacks is often underlied by  
485 different genetic architectures of moderate- to small-effect loci. This is in stark contrast to the  
486 situation in the closely related three-spined stickleback which tends to utilize the same major-effect  
487 loci in independent colonizations of freshwater habitats. However, even in the case of the three-  
488 spined stickleback, growing evidence suggests that genetic parallelism in adaptation to freshwater is  
489 not as prevalent as early studies conducted in the Eastern Pacific region suggested: a greatly  
490 reduced degree of genetic parallelism has been found in the Atlantic basin likely due to variation  
491 lost during colonizations as well as reduced gene flow among these populations (DeFaveri et al.  
492 2011; Fang et al. 2020; Dahms et al. 2022). The same also applies to stream-lake populations of  
493 three-spined sticklebacks experiencing reduced gene flow (Conte et al., 2012; Conte et al., 2015;  
494 Stuart et al., 2017; reviewed in Kemppainen et al. 2021). We suggest that further focus on genetic  
495 underpinnings of phenotypic variation in the morphologically and genetically diverse stickleback  
496 genus *Pungitius* (Guo et al. 2019) can provide a useful framework to quantify how the likelihood of  
497 genetic parallelism underlying similar phenotypic changes decreases with increasing evolutionary

498 distance between taxa (Elmer and Meyer 2011; Conte *et al.* 2012) and also inform us about  
499 variation in species' responses to changing environments (Bay et al. 2017).

500

501 **Tables**

502 **Table 1. The QTL peaks for phenotypic traits.** LG = linkage group, cM = centimorgan, PVE =  
503 percentage of variation explained.

| Phenotype       | LG | Peak (cM)           | 95%CI low (cM) | 95%CI high (cM) | Range (cM) | LOD   | PVE (%) | NO. SNPs in 95% CI |
|-----------------|----|---------------------|----------------|-----------------|------------|-------|---------|--------------------|
| Sex             | 12 | 11.286              | 10.819         | 11.286          | 0.467      | 61.08 | 74.98   | 18                 |
| Sex             | 12 | 13.623              | 13.623         | 14.090          | 0.467      | 51.25 | 68.74   | 25                 |
| Standard Length | 12 | 87.896 <sup>†</sup> | 81.591         | 92.927          | 11.336     | 5.35  | 11.43   | 139                |
| Standard Length | 16 | 43.088              | 32.301         | 45.438          | 13.137     | 7.21  | 15.08   | 110                |
| Body Height     | 6  | 55.305              | 42.172         | 63.721          | 21.549     | 4.98  | 10.68   | 547                |
| Plate number    | 4  | 137.699             | 133.021        | 137.699         | 4.678      | 4.58  | 9.87    | 1531               |
| Plate number    | 13 | 64.174              | 60.436         | 65.109          | 4.673      | 9.09  | 18.64   | 428                |
| Plate number    | 17 | 62.363              | 47.838         | 70.352          | 22.514     | 5.16  | 11.04   | 2677               |
| Plateness       | 13 | 63.240              | 56.693         | 65.109          | 8.416      | 4.92  | 10.57   | 494                |
| Plate Area      | 19 | 36.939 <sup>‡</sup> | 30.427         | 58.042          | 27.615     | 3.68  | 8.01    | 2512               |
| Plate Area      | 20 | 53.440              | 48.767         | 53.440          | 4.673      | 9.63  | 19.63   | 1642               |
| Plate Height    | 20 | 53.440              | 49.234         | 53.440          | 4.206      | 13.02 | 25.58   | 1626               |
| Plate Width     | 17 | 65.635              | 48.772         | 70.352          | 21.580     | 3.84  | 8.33    | 2663               |
| Plate Width     | 19 | 33.707              | 4.677          | 56.172          | 51.495     | 3.26  | 7.12    | 2688               |
| Plate Width     | 20 | 53.440              | 50.169         | 53.440          | 3.271      | 5.81  | 12.35   | 1597               |

504 <sup>†</sup> Pseudomarker (the nearest non-pseudo genetic position at 88.191).

505 <sup>‡</sup> Pseudomarker (the nearest non-pseudo genetic position at 36.043).

506



507 **Table 2. Comparison of the genetic architecture underlying the variation of lateral plate**  
 508 **number and size in stickleback fishes.** Populations used in the cross experiments are given in  
 509 parentheses. EL = eastern European lineage, WL = western European lineage.

| Species                                                                  | Lateral plate number |                   | Lateral plate size |             | Reference               |
|--------------------------------------------------------------------------|----------------------|-------------------|--------------------|-------------|-------------------------|
|                                                                          | QTL                  | PVE (%)           | QTL                | PVE (%)     |                         |
| <i>Gasterosteus aculeatus</i><br>(Japan × Canada)                        | LG4                  | 76.9              | LG4                | 11.5 - 12.9 | Colosimo et al.<br>2004 |
|                                                                          | LG7                  | 3.7               | LG7                | 10.3 - 11.1 |                         |
|                                                                          | LG10                 | 6.5               | LG25 <sup>†</sup>  | 17.9 - 28.9 |                         |
|                                                                          | LG26 <sup>†</sup>    | 4.5               |                    |             |                         |
| <i>Gasterosteus aculeatus</i><br>(Finland)                               | LG4                  | 74.4              | -                  | -           | Liu et al. 2014         |
|                                                                          | LG9                  | 9.1               |                    |             |                         |
|                                                                          | LG21                 | 10.6              |                    |             |                         |
| <i>Gasterosteus aculeatus</i><br>(Canada × US)                           | LG4                  | 95.7 - 97.8       | -                  | -           | Glazer et al.<br>2015   |
|                                                                          | LG7                  | 13.3 <sup>‡</sup> |                    |             |                         |
| <i>Gasterosteus aculeatus</i><br>(Canada)                                | LG1                  | 1.5 - 1.6         | -                  | -           | Erickson et al.<br>2016 |
|                                                                          | LG3                  | 2.4               |                    |             |                         |
|                                                                          | LG4                  | 68.8 - 75.8       |                    |             |                         |
|                                                                          | LG5                  | 4.5               |                    |             |                         |
|                                                                          | LG7                  | 2.9 - 4.2         |                    |             |                         |
|                                                                          | LG21                 | 1.6 - 7.5         |                    |             |                         |
| <i>Gasterosteus aculeatus</i><br>(Canada)                                | LG4                  | 85.8              | -                  | -           | Schluter et al.<br>2021 |
| <i>Pungitius pungitius</i><br>(Canada × Alaska)                          | LG12 <sup>§</sup>    | 28.4 - 30.1       | -                  | -           | Shapiro et al.<br>2009  |
| <i>Pungitius pungitius</i><br>(Finland EL)                               | LG8                  | 8.7               | -                  | -           | Yang et al.<br>2016     |
|                                                                          | LG12                 | 7.3               |                    |             |                         |
|                                                                          | LG20                 | 8.0 - 11.3        |                    |             |                         |
|                                                                          | LG21                 | 8.6 - 10.0        |                    |             |                         |
| <i>Pungitius pungitius</i><br>(Japan <i>P. sinensis</i> ×<br>Belgium WL) | LG4                  | 9.9               | LG17               | 8.3         | This study              |
|                                                                          | LG13                 | 18.6              | LG19               | 7.1 - 8.0   |                         |
|                                                                          | LG17                 | 11.0              | LG20               | 12.4 - 25.6 |                         |

510 <sup>†</sup> The original linkage group studies in *Gasterosteus aculeatus* were based on a linkage map with 26  
 511 LGs before consolidation to the 21 confirmed chromosomes.

512 <sup>‡</sup> Residual variance in *Eda* heterozygotes

513 <sup>§</sup> The same region control sex

514

515

## 516 **References**

- 517 Bailey, S. F., Blanquart, F., Bataillon, T., & Kassen, R. (2017). What drives parallel evolution?  
518 How population size and mutational variation contribute to repeated evolution. *BioEssays*, 39(1), 1-  
519 9.
- 520 Banarescu, P.M. and Paepke, H.J. (2001). The freshwater fishes of Europe, vol 5/III. *AULA*,  
521 *Wiebelsheim*.
- 522 Bay, R. A., Rose, N., Barrett, R., Bernatchez, L., Ghalambor, C. K., Lasky, J. R., ... & Ralph, P.  
523 (2017). Predicting responses to contemporary environmental change using evolutionary response  
524 architectures. *American Naturalist*, 189(5), 463-473.
- 525 Bernatchez, L., Renaut, S., Whiteley, A. R., Derome, N., Jeukens, J., Landry, L., ... & St-Cyr, J.  
526 (2010). On the origin of species: insights from the ecological genomics of lake whitefish.  
527 *Philosophical Transactions of the Royal Society B: Biological Sciences*, 365(1547), 1783-1800.
- 528 Bolnick, D. I., Barrett, R. D., Oke, K. B., Rennison, D. J., & Stuart, Y. E. (2018). (Non) parallel  
529 evolution. *Annual Review of Ecology, Evolution, and Systematics*, 49, 303-330.
- 530 Broman, K. W., & Sen, S. (2009). *A Guide to QTL Mapping with R/qtl* (Vol. 46). New York:  
531 Springer.
- 532 Broman, K. W., Gatti, D. M., Simecek, P., Furlotte, N. A., Prins, P., Sen, S., ... & Churchill, G. A.  
533 (2019). R/qtl2: software for mapping quantitative trait loci with high-dimensional data and  
534 multiparent populations. *Genetics*, 211(2), 495-502.
- 535 Chan, Y. F., Marks, M. E., Jones, F. C., Villarreal, G., Shapiro, M. D., Brady, S. D., Southwick, A.  
536 M., Absher, D. M., Grimwood, J., Schmutz, J., Myers, R. M., Petrov, D., Jónsson, B., Schluter, D.,  
537 Bell, M. A., & Kingsley, D. M. (2010). Adaptive evolution of pelvic reduction in sticklebacks by  
538 recurrent deletion of a pitxl enhancer. *Science*, 327(5963), 302–305.  
539 <https://doi.org/10.1126/SCIENCE.1182213/>
- 540 Colosimo, P. F., Peichel, C. L., Nereng, K., Blackman, B. K., Shapiro, M. D., Schluter, D., &  
541 Kingsley, D. M. (2004). The genetic architecture of parallel armor plate reduction in threespine  
542 sticklebacks. *PLoS Biology*, 2(5), e109.
- 543 Colosimo, P. F., Hosemann, K. E., Balabhadra, S., Villarreal, G., Dickson, H., Grimwood, J.,  
544 Schmutz, J., Myers, R. M., Schluter, D., & Kingsley, D. M. (2005). Widespread parallel evolution  
545 in sticklebacks by repeated fixation of ectodysplasin alleles. *Science*, 307(5717), 1928–1933.  
546 <https://doi.org/10.1126/SCIENCE.1107239>
- 547 Conte G. L., Arnegard M. E., Peichel C. L., Schluter D. (2012). The probability of genetic  
548 parallelism and convergence in natural populations. *Proc. Biol. Sci.*, 279, 5039–5047
- 549 Conte, G. L., Arnegard, M. E., Best, J., Chan, Y. F., Jones, F. C., Kingsley, D. M., ... & Peichel, C.  
550 L. (2015). Extent of QTL reuse during repeated phenotypic divergence of sympatric threespine  
551 stickleback. *Genetics*, 201(3), 1189-1200.
- 552 Coyle, S. M., Huntingford, F. A., & Peichel, C. L. (2007). Parallel evolution of Pitx1 underlies  
553 pelvic reduction in Scottish threespine stickleback (*Gasterosteus aculeatus*). *Journal of Heredity*,  
554 98(6), 581-586.

- 555 Dahms, C., Kemppainen, P., Zanella, L. N., Zanella, D., Carosi, A., Merilä, J., & Momigliano, P.  
556 (2022). Cast away in the Adriatic: Low degree of parallel genetic differentiation in three-spined  
557 sticklebacks. *Molecular Ecology*, 31(4), 1234-1253.
- 558 Danecek, P., Bonfield, J. K., Liddle, J., Marshall, J., Ohan, V., Pollard, M. O., ... & Li, H. (2021).  
559 Twelve years of SAMtools and BCFtools. *Gigascience*, 10(2), giab008.
- 560 DeFaveri, J., Shikano, T., Shimada, Y., Goto, A., & Merilä, J. (2011). Global analysis of genes  
561 involved in freshwater adaptation in threespine sticklebacks (*Gasterosteus aculeatus*). *Evolution*,  
562 65(6), 1800-1807.
- 563 DeFaveri, J., Jonsson, P. R., & Merilä, J. (2013). Heterogeneous genomic differentiation in marine  
564 threespine sticklebacks: adaptation along an environmental gradient. *Evolution*, 67(9), 2530-2546.
- 565 Dong, X., Xu, X., Yang, C., Luo, Y., Wu, Y., & Wang, J. (2021). USP7 regulates the proliferation  
566 and differentiation of ATDC5 cells through the Sox9-PTHrP-PTH1R axis. *Bone*, 143, 115714.
- 567 Elmer, K. R., Kusche, H., Lehtonen, T. K., & Meyer, A. (2010). Local variation and parallel  
568 evolution: morphological and genetic diversity across a species complex of neotropical crater lake  
569 cichlid fishes. *Philosophical Transactions of the Royal Society B: Biological Sciences*, 365(1547),  
570 1763-1782.
- 571 Elmer, K.R. & Meyer, A. (2011). Adaptation in the age of ecological genomics: insights from  
572 parallelism and convergence. *Trends in Ecology & Evolution*, 26(6), 298-306.
- 573 Erickson, P. A., Glazer, A. M., Killingbeck, E. E., Agoglia, R. M., Baek, J., Carsanaro, S. M., ... &  
574 Miller, C. T. (2016). Partially repeatable genetic basis of benthic adaptation in threespine  
575 sticklebacks. *Evolution*, 70(4), 887-902.
- 576 Fang, B., Kemppainen, P., Momigliano, P., Feng, X., & Merilä, J. (2020). On the causes of  
577 geographically heterogeneous parallel evolution in sticklebacks. *Nature Ecology & Evolution*, 4(8),  
578 1105-1115.
- 579 Fang, B., Kemppainen, P., Momigliano, P., & Merilä, J. (2021). Population structure limits parallel  
580 evolution in sticklebacks. *Molecular Biology and Evolution*, 38(10), 4205–4221.  
581 <https://doi.org/10.1093/>
- 582 Feng, X., Merilä, J., & Löytynoja, A. (2022). Complex population history affects admixture  
583 analyses in nine-spined sticklebacks. *Molecular Ecology*, 31(20), 5386-5401.
- 584 Fraimout, A., Li, Z., Sillanpää, M.J. & Merilä, J. (2022). Age-dependent genetic architecture across  
585 ontogeny of body size in sticklebacks. *Proceedings of the Royal Society B*, 289(1975), 20220352.
- 586 Glazer, A. M., Killingbeck, E. E., Mitros, T., Rokhsar, D. S., & Miller, C. T. (2015). Genome  
587 assembly improvement and mapping convergently evolved skeletal traits in sticklebacks with  
588 genotyping-by-sequencing. *G3: Genes, Genomes, Genetics*, 5(7), 1463-1472.
- 589 Guo, B., Fang, B., Shikano, T., Momigliano, P., Wang, C., Kravchenko, A., & Merilä, J. (2019). A  
590 phylogenomic perspective on diversity, hybridization and evolutionary affinities in the stickleback  
591 genus *Pungitius*. *Molecular Ecology*, 28(17), 4046-4064.
- 592 Herczeg, G., Turtiainen, M., & Merilä, J. (2010). Morphological divergence of North-European  
593 nine-spined sticklebacks (*Pungitius pungitius*): signatures of parallel evolution. *Biological Journal  
594 of the Linnean Society*, 101(2), 403-416.

- 595 Indjeian, V. B., Kingman, G. A., Jones, F. C., Guenther, C. A., Grimwood, J., Schmutz, J., ... &  
596 Kingsley, D. M. (2016). Evolving new skeletal traits by cis-regulatory changes in bone  
597 morphogenetic proteins. *Cell*, 164(1-2), 45-56.
- 598 Jeffries, D. L., Mee, J. A., & Peichel, C. L. (2022). Identification of a candidate sex determination  
599 gene in *Culaea inconstans* suggests convergent recruitment of an *Amh* duplicate in two lineages of  
600 stickleback. *Journal of evolutionary biology*, 35(12), 1683-1695.
- 601 Jones, F. C., Grabherr, M. G., Chan, Y. F., Russell, P., Mauceli, E., Johnson, J., ... & Kingsley, D.  
602 M. (2012). The genomic basis of adaptive evolution in threespine sticklebacks. *Nature*, 484(7392),  
603 55-61.
- 604 Jovelin R., He X.J.,Amores A., Yan Y.L., Shi R.H.,Qin B.F., Roe B. Cresko W.A., &Postlethwait  
605 J.H. (2007). Duplication and divergence of *fgf8* functions in teleost development and evolution.  
606 *Journal of Experimental Zoology Part B: Molecular and Developmental Evolution* 308(6): 730-  
607 743.
- 608 Kemppainen, P., Li, Z., Rastas, P., Löytynoja, A., Fang, B., Yang, J., ... & Merilä, J. (2021).  
609 Genetic population structure constrains local adaptation in sticklebacks. *Molecular Ecology*, 30(9),  
610 1946-1961.
- 611 Kivikoski, M., Rastas, P., Löytynoja, A., & Merilä, J. (2021). Automated improvement of  
612 stickleback reference genome assemblies with Lep-Anchor software. *Molecular Ecology*  
613 *Resources*, 21(6), 2166-2176.
- 614 Kivikoski, M., Rastas, P., Löytynoja, A., & Merilä, J. (2023). Predicting recombination frequency  
615 from map distance. *Heredity*, 130(3), 114-121.
- 616 Laine, V. N., Shikano, T., Herczeg, G., Vilkki, J., & Merilä, J. (2013). Quantitative trait loci for  
617 growth and body size in the nine-spined stickleback *Pungitius pungitius* L. *Molecular Ecology*,  
618 22(23), 5861–5876. <https://doi.org/10.1111/MEC.12526>
- 619 Lang, D., Powell, S. K., Plummer, R. S., Young, K. P., & Ruggeri, B. A. (2007). PAX genes: roles  
620 in development, pathophysiology, and cancer. *Biochemical pharmacology*, 73(1), 1-14.
- 621 Lee, K., & Coop, G. (2017). Distinguishing among modes of convergent adaptation using  
622 population genomic data. *Genetics*, 207, 1591– 1619. <https://doi.org/10.1534/genetics.117.300417>
- 623 Leinonen, T., McCairns, R. S., Herczeg, G., & Merilä, J. (2012). Multiple evolutionary pathways to  
624 decreased lateral plate coverage in freshwater threespine sticklebacks. *Evolution*, 66(12), 3866-  
625 3875.
- 626 Li, H., & Durbin, R. (2009). Fast and accurate short read alignment with Burrows–Wheeler  
627 transform. *Bioinformatics*, 25(14), 1754-1760.
- 628 Li, H. (2011). A statistical framework for SNP calling, mutation discovery, association mapping  
629 and population genetical parameter estimation from sequencing data. *Bioinformatics*, 27(21), 2987-  
630 2993.
- 631 Li, X., & Cao, X. U. (2006). BMP signaling and skeletogenesis. *Annals of the New York Academy*  
632 *of Sciences*, 1068(1), 26-40.

- 633 Li, Z., Guo, B., Yang, J., Herczeg, G., Gonda, A., Balázs, G., ... & Merilä, J. (2017). Deciphering  
634 the genomic architecture of the stickleback brain with a novel multilocus gene-mapping approach.  
635 *Molecular Ecology*, 26(6), 1557-1575.
- 636 Li, Z., Kempainen, P., Rastas, P., & Merilä, J. (2018). Linkage disequilibrium clustering-based  
637 approach for association mapping with tightly linked genomewide data. *Molecular Ecology*  
638 *Resources*, 18(4), 809-824.
- 639 Liu, J., Shikano, T., Leinonen, T., Cano, J. M., Li, M. H., & Merilä, J. (2014). Identification of  
640 major and minor QTL for ecologically important morphological traits in three-spined sticklebacks  
641 (*Gasterosteus aculeatus*). *G3: Genes, Genomes, Genetics*, 4(4), 595-604.
- 642 Loehr, J., Leinonen, T., Herczeg, G., O'Hara, R. B., & Merilä, J. (2012). Heritability of asymmetry  
643 and lateral plate number in the threespine stickleback. *PLoS One*, 7(7), e39843.
- 644 Luo, M., Zhou, J., Leu, N. A., Abreu, C. M., Wang, J., Anguera, M. C., ... & Wang, P. J. (2015).  
645 Polycomb protein SCML2 associates with USP7 and counteracts histone H2A ubiquitination in the  
646 XY chromatin during male meiosis. *PLoS Genetics*, 11(1), e1004954.
- 647 MacPherson, A., & Nuismer, S. L. (2017). The probability of parallel genetic evolution from  
648 standing genetic variation. *Journal of Evolutionary Biology*, 30(2), 326-337.
- 649 Marchinko, K. B., & Schluter, D. (2007). Parallel evolution by correlated response: lateral plate  
650 reduction in threespine stickleback. *Evolution*, 61(5), 1084-1090.
- 651 Martin, A., & Orgogozo, V. (2013). The loci of repeated evolution: a catalog of genetic hotspots of  
652 phenotypic variation. *Evolution*, 67(5), 1235-1250.
- 653 Merilä, J. (2013). Nine-spined stickleback (*Pungitius pungitius*): an emerging model for  
654 evolutionary biology research. *Annals of the New York Academy of Sciences*, 1289(1), 18-35.
- 655 Merilä, J. (2014). Lakes and ponds as model systems to study parallel evolution. *Journal of*  
656 *Limnology*. 73:33–45.
- 657 Miller, M. R., Dunham, J. P., Amores, A., Cresko, W. A. and Johnson, E. A. (2007). Rapid and  
658 cost-effective polymorphism identification and genotyping using restriction site associated DNA  
659 (RAD) markers. *Genome research*, 17, 240–248.
- 660 Miller, C. T., Glazer, A. M., Summers, B. R., Blackman, B. K., Norman, A. R., Shapiro, M. D.,  
661 Cole, B. L., Peichel, C. L., Schluter, D., & Kingsley, D. M. (2014). Modular skeletal evolution in  
662 sticklebacks is controlled by additive and clustered quantitative trait loci. *Genetics*, 197(1), 405–  
663 420. <https://doi.org/10.1534/GENETICS.114.162420>
- 664 Natri, H. M., Merilä, J., & Shikano, T. (2019). The evolution of sex determination associated with a  
665 chromosomal inversion. *Nature Communications*, 10(1), 1-13.
- 666 O'Brown, N. M., Summers, B. R., Jones, F. C., Brady, S. D., & Kingsley, D. M. (2015). A recurrent  
667 regulatory change underlying altered expression and Wnt response of the stickleback armor plates  
668 gene EDA. *elife*, 4, e05290.
- 669 Peichel, C. L., & Marques, D. A. (2017). The genetic and molecular architecture of phenotypic  
670 diversity in sticklebacks. *Philosophical Transactions of the Royal Society B: Biological Sciences*,  
671 372(1713), 20150486.

- 672 Peichel, C. L., McCann, S. R., Ross, J. A., Naftaly, A. F., Urton, J. R., Cech, J. N., ... & White, M.  
673 A. (2020). Assembly of the threespine stickleback Y chromosome reveals convergent signatures of  
674 sex chromosome evolution. *Genome Biology*, 21(1), 1-31.
- 675 Ralph, P. L., & Coop, G. (2015). The role of standing variation in geographic convergent  
676 adaptation. *American Naturalist*, 186(S1), S5-S23.
- 677 R Core Team (2022). R: A language and environment for statistical computing. R Foundation for  
678 Statistical Computing, Vienna, Austria. <https://www.R-project.org/>.
- 679 Rastas, P. (2017). Lep-MAP3: robust linkage mapping even for low-coverage whole genome  
680 sequencing data. *Bioinformatics*, 33(23), 3726-3732.
- 681 Rastas, P. (2020). Lep-Anchor: automated construction of linkage map anchored haploid genomes.  
682 *Bioinformatics*, 36(8), 2359-2364.
- 683 Reid, K., Bell, M. A., & Veeramah, K. R. (2021). Threespine stickleback: A model system for  
684 evolutionary genomics. *Annual review of genomics and human genetics*, 22, 357-383.  
685 <https://doi.org/10.1146/annurev-genom-111720>
- 686 Roberts Kingman, G. A., Vyas, D. N., Jones, F. C., Brady, S. D., Chen, H. I., Reid, K., ... &  
687 Veeramah, K. R. (2021). Predicting future from past: The genomic basis of recurrent and rapid  
688 stickleback evolution. *Science Advances*, 7(25), eabg5285.
- 689 Rodríguez-Ramírez, C. E., Hiltbrunner, M., Saladin, V., Walker, S., Urrutia, A., & Peichel, C. L.  
690 (2023). Molecular mechanisms of *Eda*-mediated adaptation to freshwater in threespine stickleback.  
691 *Molecular Ecology*, 00, 1– 19. <https://doi.org/10.1111/mec.16989>
- 692 Sardell, J. M., Josephson, M. P., Dalziel, A. C., Peichel, C. L., & Kirkpatrick, M. (2021).  
693 Heterogeneous histories of recombination suppression on stickleback sex chromosomes. *Molecular*  
694 *Biology and Evolution*, 38(10), 4403-4418.
- 695 Schlötterer, C. (2023). How predictable is adaptation from standing genetic variation? Experimental  
696 evolution in *Drosophila* highlights the central role of redundancy and linkage disequilibrium.  
697 *Philosophical Transactions of the Royal Society B*, 378(1877), 20220046.
- 698 Schluter, D., Clifford, E. A., Nemethy, M., & McKinnon, J. S. (2004). Parallel evolution and  
699 inheritance of quantitative traits. *American Naturalist*, 163(6), 809-822.
- 700 Schluter, D., Marchinko, K. B., Arnegard, M. E., Zhang, H., Brady, S. D., Jones, F. C., Bell, M. A.,  
701 & Kingsley, D. M. (2021). Fitness maps to a large-effect locus in introduced stickleback  
702 populations. *Proceedings of the National Academy of Sciences of the United States of America*,  
703 118(3), e1914889118. <https://doi.org/10.1073/PNAS.1914889118>
- 704 Shapiro, M. D., Summers, B. R., Balabhadra, S., Aldenhoven, J. T., Miller, A. L., Cunningham, C.  
705 B., ... & Kingsley, D. M. (2009). The genetic architecture of skeletal convergence and sex  
706 determination in ninespine sticklebacks. *Current Biology*, 19(13), 1140-1145.
- 707 Shawi, M., & Serluca, F. C. (2008). Identification of a *BMP7* homolog in zebrafish expressed in  
708 developing organ systems. *Gene Expression Patterns*, 8(6), 369-375.
- 709 Shikano, T., Shimada, Y., Herczeg, G., & Merilä, J. (2010). History vs. habitat type: explaining the  
710 genetic structure of European nine-spined stickleback (*Pungitius pungitius*) populations. *Molecular*  
711 *Ecology*, 19(6), 1147-1161.

- 712 Shikano, T., Laine, V. N., Herczeg, G., Vilkki, J., & Merilä, J. (2013). Genetic architecture of  
713 parallel pelvic reduction in ninespine sticklebacks. *G3: Genes, Genomes, Genetics*, 3(10), 1833-  
714 1842.
- 715 Shimada, Y., Shikano, T., Kuparinen, A., Gonda, A., Leinonen, T. & Merilä, J. (2011). Quantitative  
716 genetics of body size and timing of maturation in two nine-spined stickleback (*Pungitius pungitius*)  
717 populations. *PLoS One*, 6(12), e28859.
- 718 Smith, S. R., Amish, S. J., Bernatchez, L., Le Luyer, J., C. Wilson, C., Boeberitz, O., ... & Scribner,  
719 K. T. (2020). Mapping of adaptive traits enabled by a high-density linkage map for Lake Trout. *G3:  
720 Genes, Genomes, Genetics*, 10(6), 1929-1947.
- 721 Stewart, J. R., & Thompson, M. B. (2009). Parallel evolution of placentation in Australian scincid  
722 lizards. *Journal of Experimental Zoology Part B: Molecular and Developmental Evolution*, 312(6),  
723 590-602.
- 724 Stuart, Y. E., Veen, T., Weber, J. N., Hanson, D., Ravinet, M., Lohman, B. K., ... & Bolnick, D. I.  
725 (2017). Contrasting effects of environment and genetics generate a continuum of parallel evolution.  
726 *Nature Ecology & Evolution*, 1(6), 0158.
- 727 Teacher, A. G., Shikano, T., Karjalainen, M. E., & Merilä, J. (2011). Phylogeography and genetic  
728 structuring of European nine-spined sticklebacks (*Pungitius pungitius*)—mitochondrial DNA  
729 evidence. *PLoS One*, 6(5), e19476.
- 730 Thompson, K. A., Osmond, M. M., & Schluter, D. (2019). Parallel genetic evolution and speciation  
731 from standing variation. *Evolution Letters*, 3, 129– 141. <https://doi.org/10.1002/evl3.106>
- 732 Trokovic, N., Herczeg, G., Scott McCairns, R. J., Izza Ab Ghani, N., & Merilä, J. (2011).  
733 Intraspecific divergence in the lateral line system in the nine-spined stickleback (*Pungitius*  
734 *pungitius*). *Journal of Evolutionary Biology*, 24, 1546-1558.
- 735 Varadharajan, S., Rastas, P., Löytynoja, A., Matschiner, M., Calboli, F. C., Guo, B., ... & Merilä, J.  
736 (2019). A high-quality assembly of the nine-spined stickleback (*Pungitius pungitius*)  
737 genome. *Genome Biology and Evolution*, 11(11), 3291-3308.
- 738 Wang, M., Zhang, T., Zhang, X., Jiang, Z., Peng, M., & Huang, Z. (2020). *BMP2K* dysregulation  
739 promotes abnormal megakaryopoiesis in acute megakaryoblastic leukemia. *Cell & Bioscience*, 10,  
740 1-14.
- 741 Yang, J., Guo, B., Shikano, T., Liu, X., & Merilä, J. (2016). Quantitative trait locus analysis of  
742 body shape divergence in nine-spined sticklebacks based on high-density SNP-panel. *Scientific*  
743 *Reports*, 6(1), 1-16.
- 744
